# Supplementary material
Source: PubMed Central journal article supplement (PMC3993308)
Supplement: AEM.04067-13_zam999105298so1.pdf [file AEM.04067-13_zam999105298so1.pdf]

AEM 04067-13 Londesborough et al, Effect of C-terminal protein tags on pentitol and L-arabinose transport by *Ambrosiozyma monospora* Lat1 and Lat2 transporters expressed in *Saccharomyces cerevisiae*.

Supplementary material.

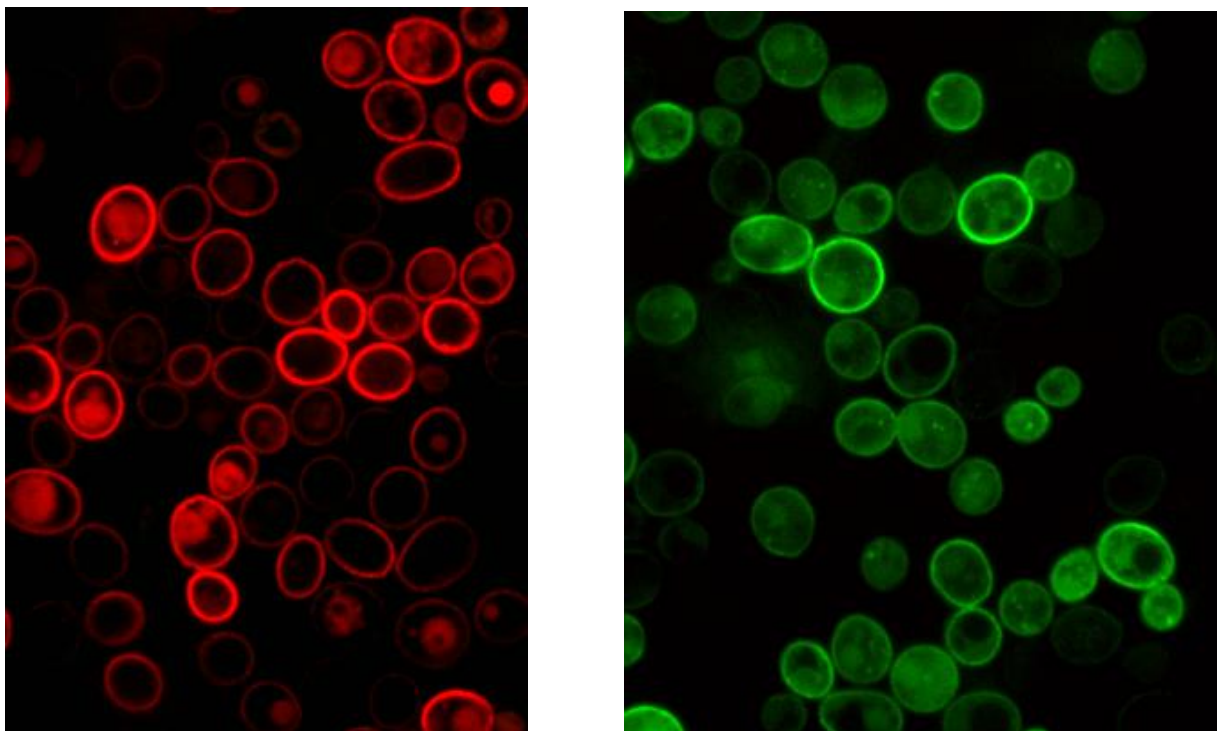

Fig S1. Confocal fluorescence microscopy of H4388 carrying *pLAT1-mCherry* and H4390 carrying *pLAT2-GFP*. Cells were grown and harvested in the same way as samples for transport assays.
